# Supplementary material for: Structural, Vibrational, and Electronic Properties of the Glucoalkaloid Strictosidine: A Combined Experimental and Theoretical Study
Source: Hindawi journal article supplement (doi:10.1155/2016/1752429), 2016-01-01
Supplement: f1 [file 1752429.f1.pdf]

MATERIAL SUPPORTING TO

**Structural, vibrational and electronic properties of the glucoalkaloid strictosidine: a combined experimental and theoretical study**

**Renyer A. Costa<sup>a</sup>, Maria Lucia B. Pinheiro<sup>a</sup>, Kelson M.T. Oliveira<sup>a\*</sup>, Andersson Barison<sup>b</sup>, Kahlil S. Salomé<sup>b</sup>, Julio Rodolfo Iank<sup>a</sup>, Noam Gadelha da Silva<sup>a</sup>, Tiara S. Cabral<sup>c</sup> and Emmanoel C. Vilaça<sup>a</sup>**

<sup>a</sup> Department of Chemistry - Federal University of Amazonas, Manaus, Amazonas, Brazil; E-Mails: renyer.costa@gmail.com, lbelem@ufam.edu.br, kelsonmota@ufam.edu.br

<sup>b</sup> NMR Laboratory - Department of Chemistry - Federal University of Paraná, Paraná, Curitiba, Brazil

<sup>c</sup> National Research Institute of Amazonas - INPA, Manaus, Amazonas, Brazil

**Table S1.** 1D and 2D NMR signals of strictosidine

| Position | $\delta_c$ , type | $\delta_H$ ( $J$ in Hz)                                                              | HMBC                   |
|----------|-------------------|--------------------------------------------------------------------------------------|------------------------|
| 1        | -                 | -                                                                                    | -                      |
| 2        | 130.4             | -                                                                                    | -                      |
| 3        | 53.4              | 4.68 (d, $J= 11.4$ Hz, 1H)                                                           | 2, 15                  |
| 4        | -                 | -                                                                                    | -                      |
| 5        | 42.3              | 3.74(d, $J=6$ Hz, 1H) e<br>3,1 (m, 1H)                                               | 3, 6, 7                |
| 6        | 23.2              | 3.4(t, $J= 4.8$ Hz, 1H) e<br>3.0(d, $J= 6.6$ Hz, 1H)                                 | 7, 2                   |
| 7        | 108.0             | -                                                                                    | -                      |
| 8        | 127.2             | -                                                                                    | -                      |
| 9        | 119.1             | 7.47                                                                                 | 7, 11, 13              |
| 10       | 120.2             | 7.04                                                                                 | 8, 12                  |
| 11       | 123.3             | 7.13                                                                                 | 9, 13                  |
| 12       | 112.2             | 7.33                                                                                 | 8, 10                  |
| 13       | 137.8             | -                                                                                    | -                      |
| 14       | 34.7              | 2.3<br>(ddd, $J=1.8$ ; 11.4; 13.2,<br>1H)<br>e 2.2(ddd, $J=3.6$ ; 12;<br>13.2Hz, 1H) | 16                     |
| 15       | 32.5              | 3.12 (d, $J=4.8$ Hz, 1H)                                                             | 3, 16, 21              |
| 16       | 108.6             | -                                                                                    | -                      |
| 17       | 156.6             | 7.8(s, 1H)                                                                           | 15, 16, 21, 22         |
| 18       | 119.4             | 5.2 e 5.3 (m, 2H)                                                                    | 19, 20                 |
| 19       | 134               | 5.851 (dd, $J= 3:12$ Hz,<br>1H)                                                      | 15, 21                 |
| 20       | 45.3              | 2.7(dd, $J= 3;8.4$ Hz,<br>1H)                                                        | 14, 16, 18,<br>21, C1' |
| 21       | 97.5              | 5.853(d, $J= 8.4$ Hz, 1H)                                                            | 15, 19, 20, 1'         |
| 22       | 171.3             | -                                                                                    | -                      |
| 1'       | 100.1             | 4.82(m, 1H)                                                                          | 3'                     |

|                    |      |                  |            |
|--------------------|------|------------------|------------|
| 2'                 | 74   | 3.6(m, 1H)       | 4'         |
| 3'                 | 78   | 3.5(m, 1H)       | 2', 4', 5' |
| 4'                 | 73   | 3.6(m, 1H)       | 2'         |
| 5'                 | 71   | 3.2(m, 1H)       | 3', 1'     |
| 6'                 | 62.7 | 3.6 e 3.5(m, 1H) | 4'         |
| CH <sub>3</sub> O- | 52.7 | 3.8(s,3H)        | 22         |

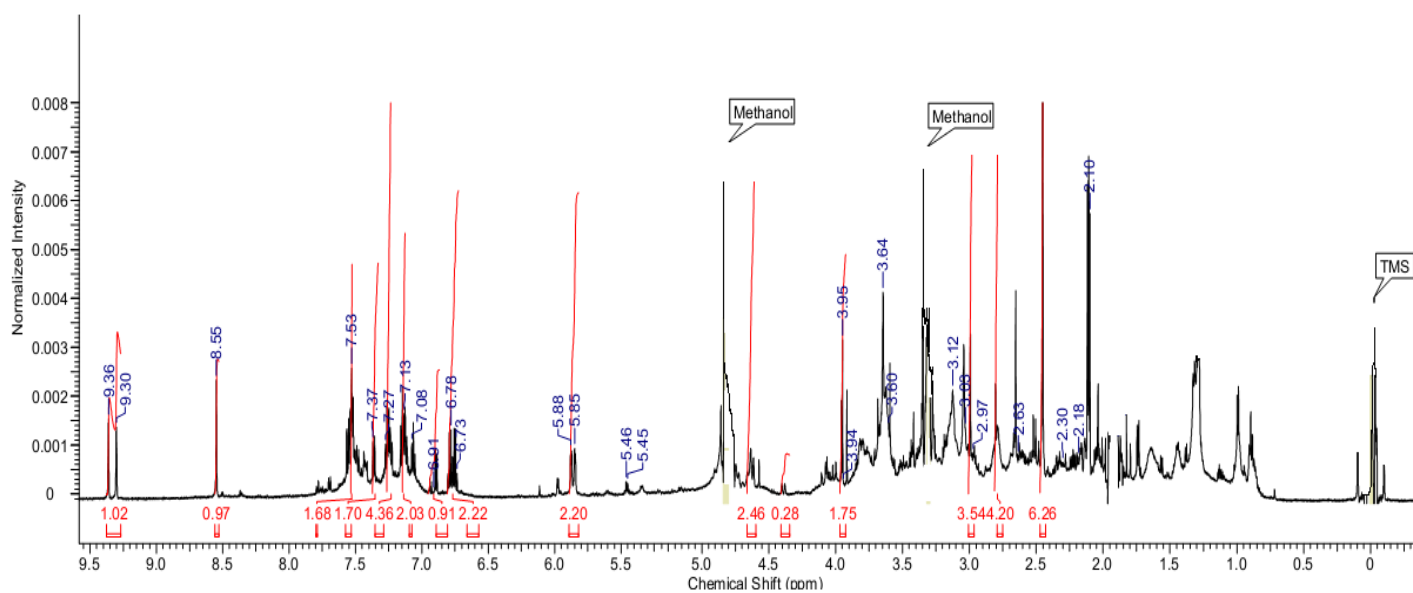

Figure S1. <sup>1</sup>H NMR spectrum of strictosidine

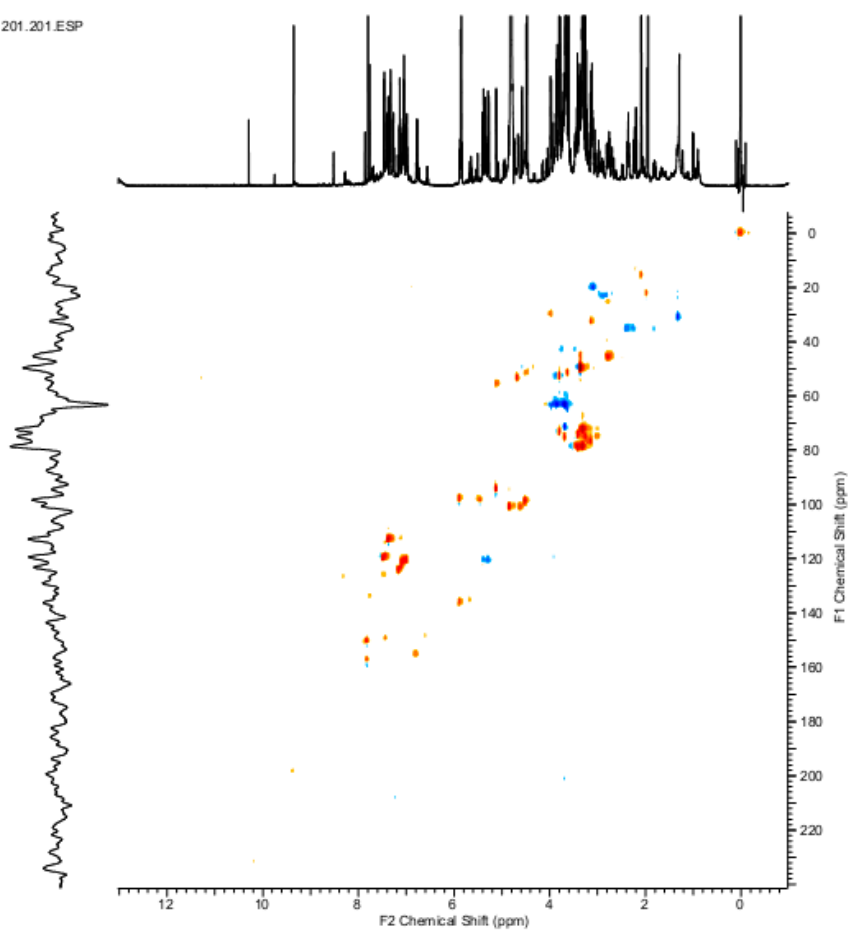

**Figure S2.** HSQC spectrum of strictosidine

ALCALOIDE\_6\_SET.300.ESP

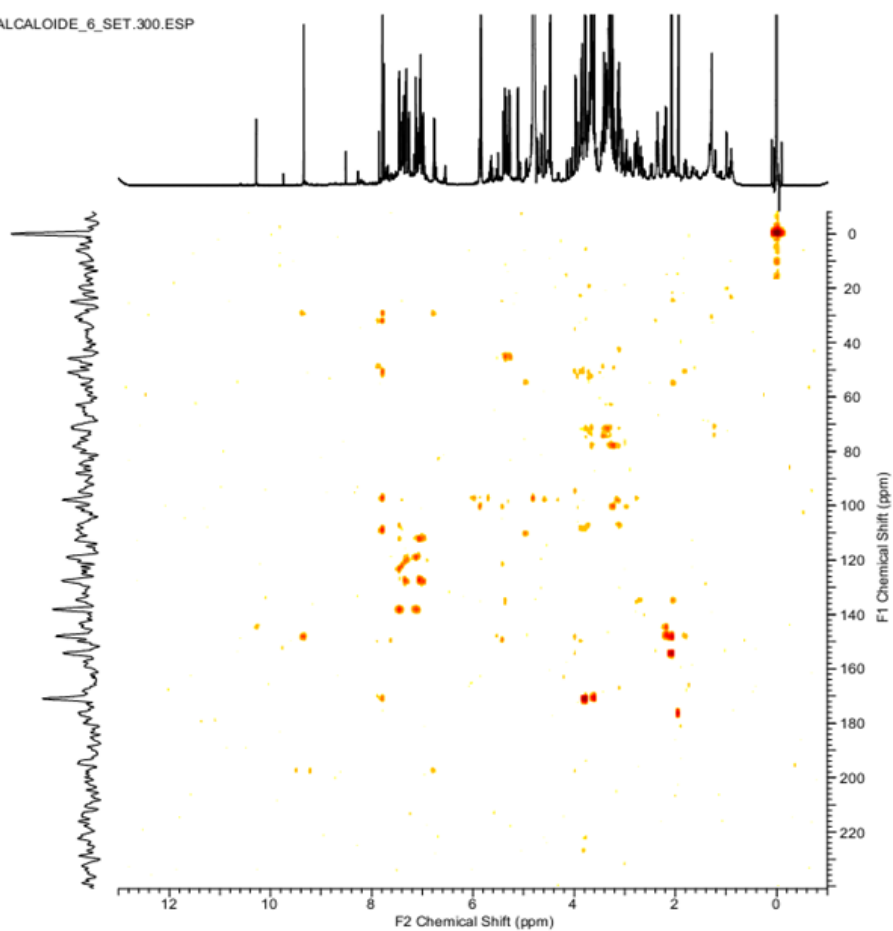

**Figure S3.** HMBC spectrum of strictosidine

extrato\_folhas\_metanol\_strycnos #319-332 RT: 3.85-4.03 AV: 14 NL: 1.80E3  
T: ITMS + c ESI Full ms2 531.00@cid0.00 [145.00-532.00]

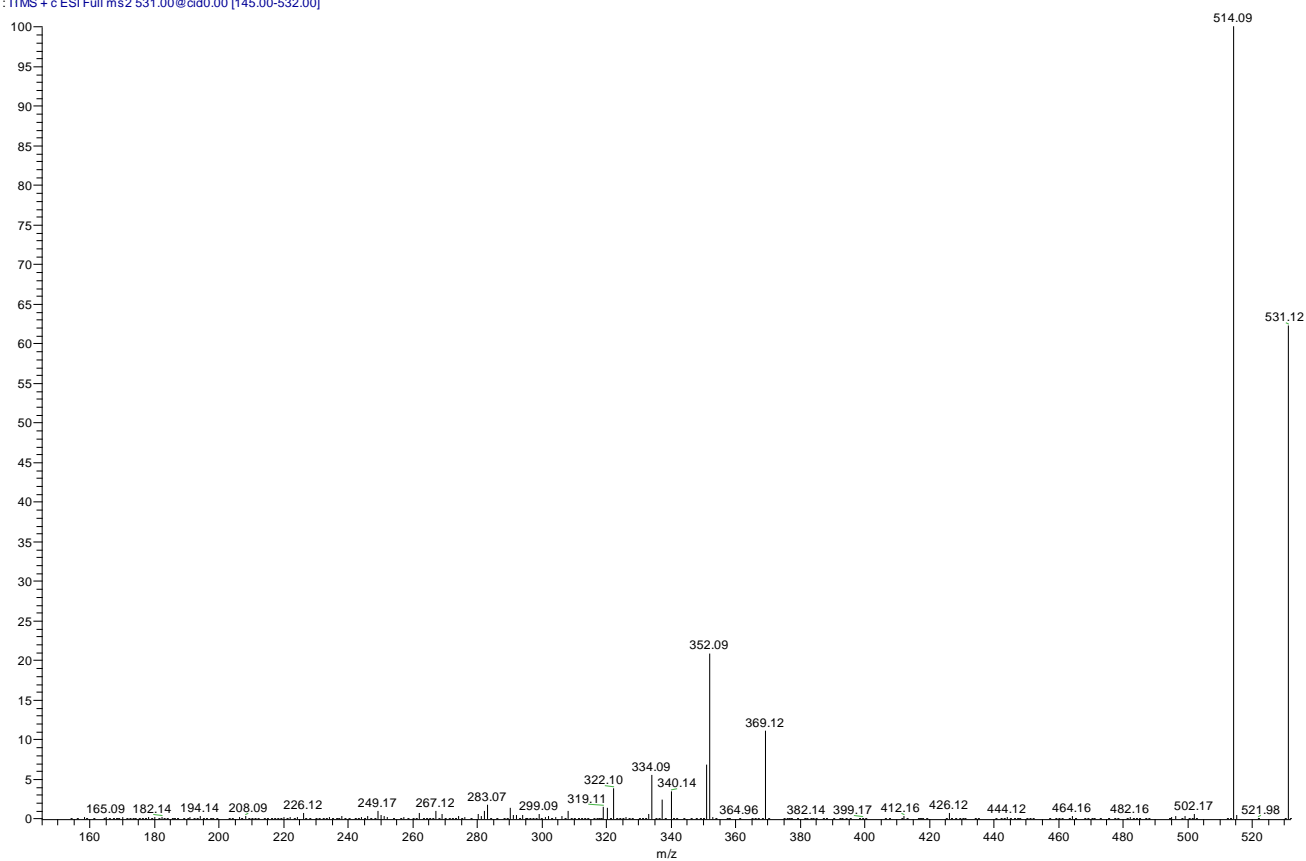

flv #24-29 RT: 0.29-0.36 AV: 6 NL: 7.11E2  
T: ITMS + c ESI Full ms3 531.00@cid25.00 514.00@cid25.00 [140.00-515.00]

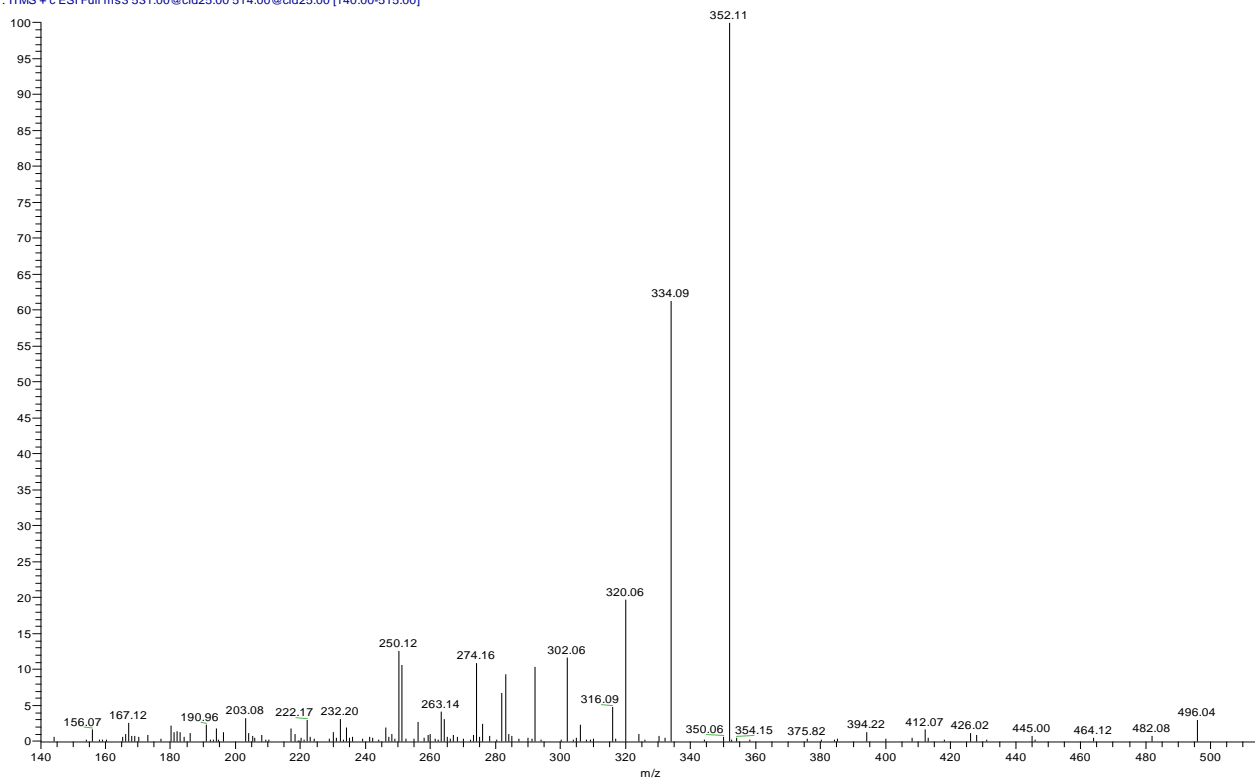

**Figure S4.** ESI-IT-MS spectra of strictosidine.  $Ms^2$  spectrum of ion peak  $m/z$  531 (top)  $ms^3$  of ion peak  $m/z$  514.

**Table S2.** Natural population analysis

| Atom | Natural Charge | Natural Population |         |         |       |
|------|----------------|--------------------|---------|---------|-------|
|      |                | Core               | Valence | Rydberg | Total |
| C11  | -0.257         | 1.999              | 4.244   | 0.0140  | 6.257 |
| C10  | -0.272         | 1.999              | 4.258   | 0.0139  | 6.271 |
| C9   | -0.232         | 1.999              | 4.258   | 0.0139  | 6.272 |
| C8   | -0.094         | 1.999              | 4.080   | 0.0146  | 6.094 |
| C13  | 0.156          | 1.999              | 3.826   | 0.0186  | 5.844 |
| C12  | -0.271         | 1.999              | 4.259   | 0.0129  | 6.271 |
| N1   | -0.558         | 1.999              | 5.549   | 0.0101  | 7.558 |
| C7   | -0.115         | 1.999              | 4.101   | 0.0150  | 6.115 |
| C2   | 0.167          | 1.999              | 3.812   | 0.0206  | 5.832 |
| C6   | -0.485         | 1.999              | 4.476   | 0.0102  | 6.485 |
| C5   | -0.260         | 1.999              | 4.243   | 0.0175  | 6.260 |
| N4   | -0.706         | 1.999              | 5.691   | 0.0158  | 7.706 |
| C14  | -0.457         | 1.999              | 4.444   | 0.0140  | 6.457 |
| C15  | -0.263         | 1.999              | 4.246   | 0.0173  | 6.263 |
| C20  | -0.323         | 1.999              | 4.307   | 0.0169  | 6.323 |
| C19  | -0.224         | 1.999              | 4.208   | 0.0173  | 6.224 |
| C18  | -0.433         | 1.999              | 4.422   | 0.0112  | 6.433 |
| C16  | -0.259         | 1.999              | 4.243   | 0.0175  | 6.259 |
| C17  | 0.222          | 1.999              | 3.755   | 0.0228  | 5.777 |
| O3   | -0.537         | 1.999              | 6.525   | 0.0128  | 8.537 |
| C21  | 0.411          | 1.999              | 3.560   | 0.0228  | 5.588 |
| C22  | 0.812          | 1.999              | 3.145   | 0.0429  | 5.187 |
| O4   | -0.578         | 1.999              | 6.565   | 0.0131  | 8.578 |
| C1'  | 0.397          | 1.999              | 3.572   | 0.0314  | 5.602 |
| C5'  | 0.029          | 1.999              | 3.949   | 0.0225  | 5.970 |
| C3'  | 0.048          | 1.999              | 3.927   | 0.0246  | 5.951 |
| C4'  | 0.045          | 1.999              | 3.932   | 0.0235  | 5.955 |
| H11  | 0.240          | 0.000              | 0.759   | 0.0007  | 0.760 |
| H10  | 0.238          | 0.000              | 0.761   | 0.0009  | 0.762 |
| H9   | 0.240          | 0.000              | 0.759   | 0.0009  | 0.760 |
| H12  | 0.244          | 0.000              | 0.754   | 0.0094  | 0.755 |
| H1   | 0.446          | 0.000              | 0.552   | 0.0015  | 0.553 |
| H6b  | 0.245          | 0.000              | 0.752   | 0.0017  | 0.754 |
| H6s  | 0.237          | 0.000              | 0.761   | 0.0019  | 0.763 |
| H5b  | 0.224          | 0.000              | 0.773   | 0.0017  | 0.775 |
| H5a  | 0.239          | 0.000              | 0.759   | 0.0012  | 0.761 |
| H7   | 0.392          | 0.000              | 0.605   | 0.0021  | 0.607 |
| H14S | 0.237          | 0.000              | 0.761   | 0.0012  | 0.762 |
| H14R | 0.243          | 0.000              | 0.755   | 0.0017  | 0.757 |
| H15  | 0.281          | 0.000              | 0.715   | 0.0028  | 0.718 |
| H20  | 0.277          | 0.000              | 0.720   | 0.0024  | 0.722 |
| H19  | 0.237          | 0.000              | 0.760   | 0.0014  | 0.762 |

|        |        |       |       |        |       |
|--------|--------|-------|-------|--------|-------|
| H18    | 0.225  | 0.000 | 0.774 | 0.0007 | 0.775 |
| H18    | 0.224  | 0.000 | 0.774 | 0.0023 | 0.776 |
| H17    | 0.244  | 0.000 | 0.754 | 0.0012 | 0.755 |
| H21    | 0.225  | 0.000 | 0.771 | 0.0031 | 0.774 |
| H1'    | 0.213  | 0.000 | 0.783 | 0.0035 | 0.786 |
| H3'    | 0.225  | 0.000 | 0.772 | 0.0034 | 0.775 |
| O2     | -0.649 | 1.999 | 6.631 | 0.0176 | 8.649 |
| O1     | -0.557 | 1.999 | 6.547 | 0.0103 | 8.557 |
| CH3    | -0.322 | 1.999 | 4.308 | 0.0142 | 6.322 |
| H(CH3) | 0.229  | 0.000 | 0.769 | 0.0005 | 0.770 |
| H(CH3) | 0.219  | 0.000 | 0.778 | 0.0015 | 0.780 |
| H(CH3) | 0.219  | 0.000 | 0.779 | 0.0015 | 0.781 |
| O5     | -0.626 | 1.999 | 6.613 | 0.0133 | 8.626 |
| C2'    | 0.046  | 1.999 | 3.929 | 0.0250 | 5.953 |
| O7     | -0.777 | 1.999 | 6.765 | 0.0124 | 8.777 |
| H3''   | 0.501  | 0.000 | 0.496 | 0.0025 | 0.498 |
| O8     | -0.777 | 1.999 | 6.765 | 0.0127 | 8.777 |
| H4''   | 0.504  | 0.000 | 0.494 | 0.0009 | 0.495 |
| H4'    | 0.233  | 0.000 | 0.764 | 0.0003 | 0.767 |
| O6     | -0.768 | 1.999 | 6.756 | 0.0127 | 8.768 |
| H2''   | 0.497  | 0.000 | 0.500 | 0.0021 | 0.502 |
| H2'    | 0.228  | 0.000 | 0.767 | 0.0037 | 0.771 |
| C6'    | -0.111 | 1.999 | 4.092 | 0.0201 | 6.111 |
| H6'b   | 0.206  | 0.000 | 0.791 | 0.0023 | 0.793 |
| H6'a   | 0.232  | 0.000 | 0.766 | 0.0017 | 0.768 |
| O9     | -0.765 | 1.999 | 6.753 | 0.0125 | 8.765 |
| H6''   | 0.487  | 0.000 | 0.510 | 0.0024 | 0.513 |
| H5'    | 0.229  | 0.000 | 0.767 | 0.0037 | 0.771 |
| C2     | -0.088 | 1.999 | 4.070 | 0.0197 | 6.088 |
| H3     | 0.265  | 0.000 | 0.732 | 0.0024 | 0.734 |



**Table S3.** Natural bond orbital analysis

| Cycle | Occupation Threshold | Occupancies |           | Dev  |
|-------|----------------------|-------------|-----------|------|
|       |                      | lewis       | Non-lewis |      |
| 1     | 1.90                 | 273.8       | 8.13      | 0.68 |
| 2     | 1.90                 | 273.8       | 8.13      | 0.68 |
| 3     | 1.90                 | 275.9       | 6.05      | 0.49 |
| 4     | 1.80                 | 275.9       | 6.05      | 0.49 |
| 5     | 1.80                 | 277.3       | 4.67      | 0.37 |
| 6     | 1.70                 | 277.3       | 4.67      | 0.37 |
| 7     | 1.70                 | 277.4       | 4.52      | 0.49 |
| 8     | 1.60                 | 277.1       | 4.91      | 0.37 |
| 9     | 1.60                 | 277.4       | 4.52      | 0.49 |
| 10    | 1.60                 | 277.1       | 4.91      | 0.37 |
| 11    | 1.60                 | 277.4       | 4.52      | 0.49 |
| 12    | 1.60                 | 277.1       | 4.91      | 0.37 |
| 13    | 1.60                 | 277.4       | 4.52      | 0.49 |
| 14    | 1.60                 | 277.1       | 4.91      | 0.37 |
| 15    | 1.60                 | 277.4       | 4.52      | 0.49 |
| 16    | 1.50                 | 275.2       | 6.76      | 0.91 |
| 17    | 1.50                 | 276.5       | 5.50      | 0.73 |
| 18    | 1.50                 | 276.5       | 5.50      | 0.73 |
| 19    | 1.60                 | 277.4       | 4.52      | 0.49 |

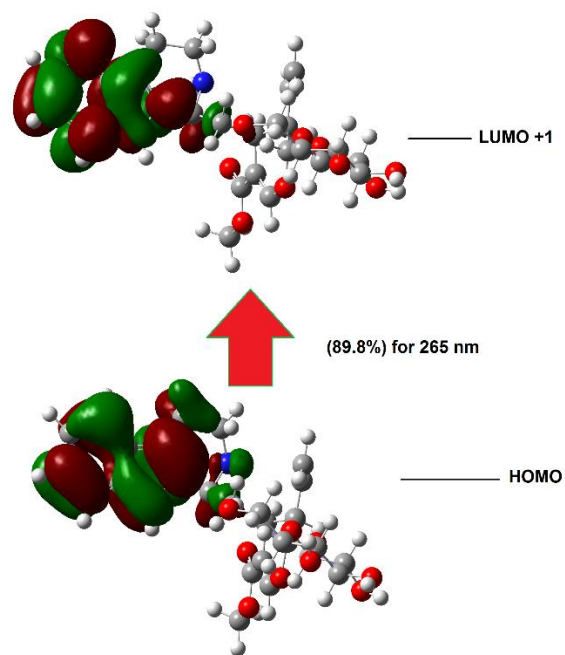

**Figure S5.** Most contributive electronic transition for 265 nm in B3LYP 6-31G(d)

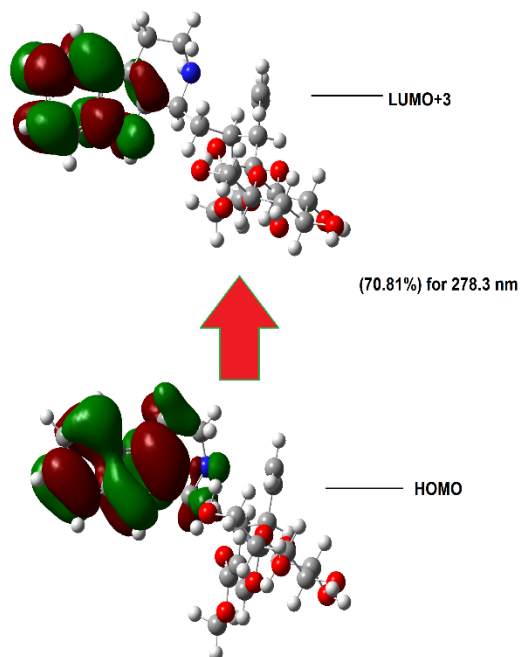

**Figure S6.** Most contributive electronic transition for 278 nm in B3LYP 6-311++G(2d,p)
